# Supplementary material for: Continent-Wide Decoupling of Y-Chromosomal Genetic Variation from Language and Geography in Native South Americans
Source: PubMed Central journal article supplement (PMC3623769; doi:10.1371/journal.pgen.1003460), 2013-04-11

- Northwest-South-America
- Central-South-America
- South-Amazon
- North-Amazon
- El-Beni/Rondonia
- Patagonia

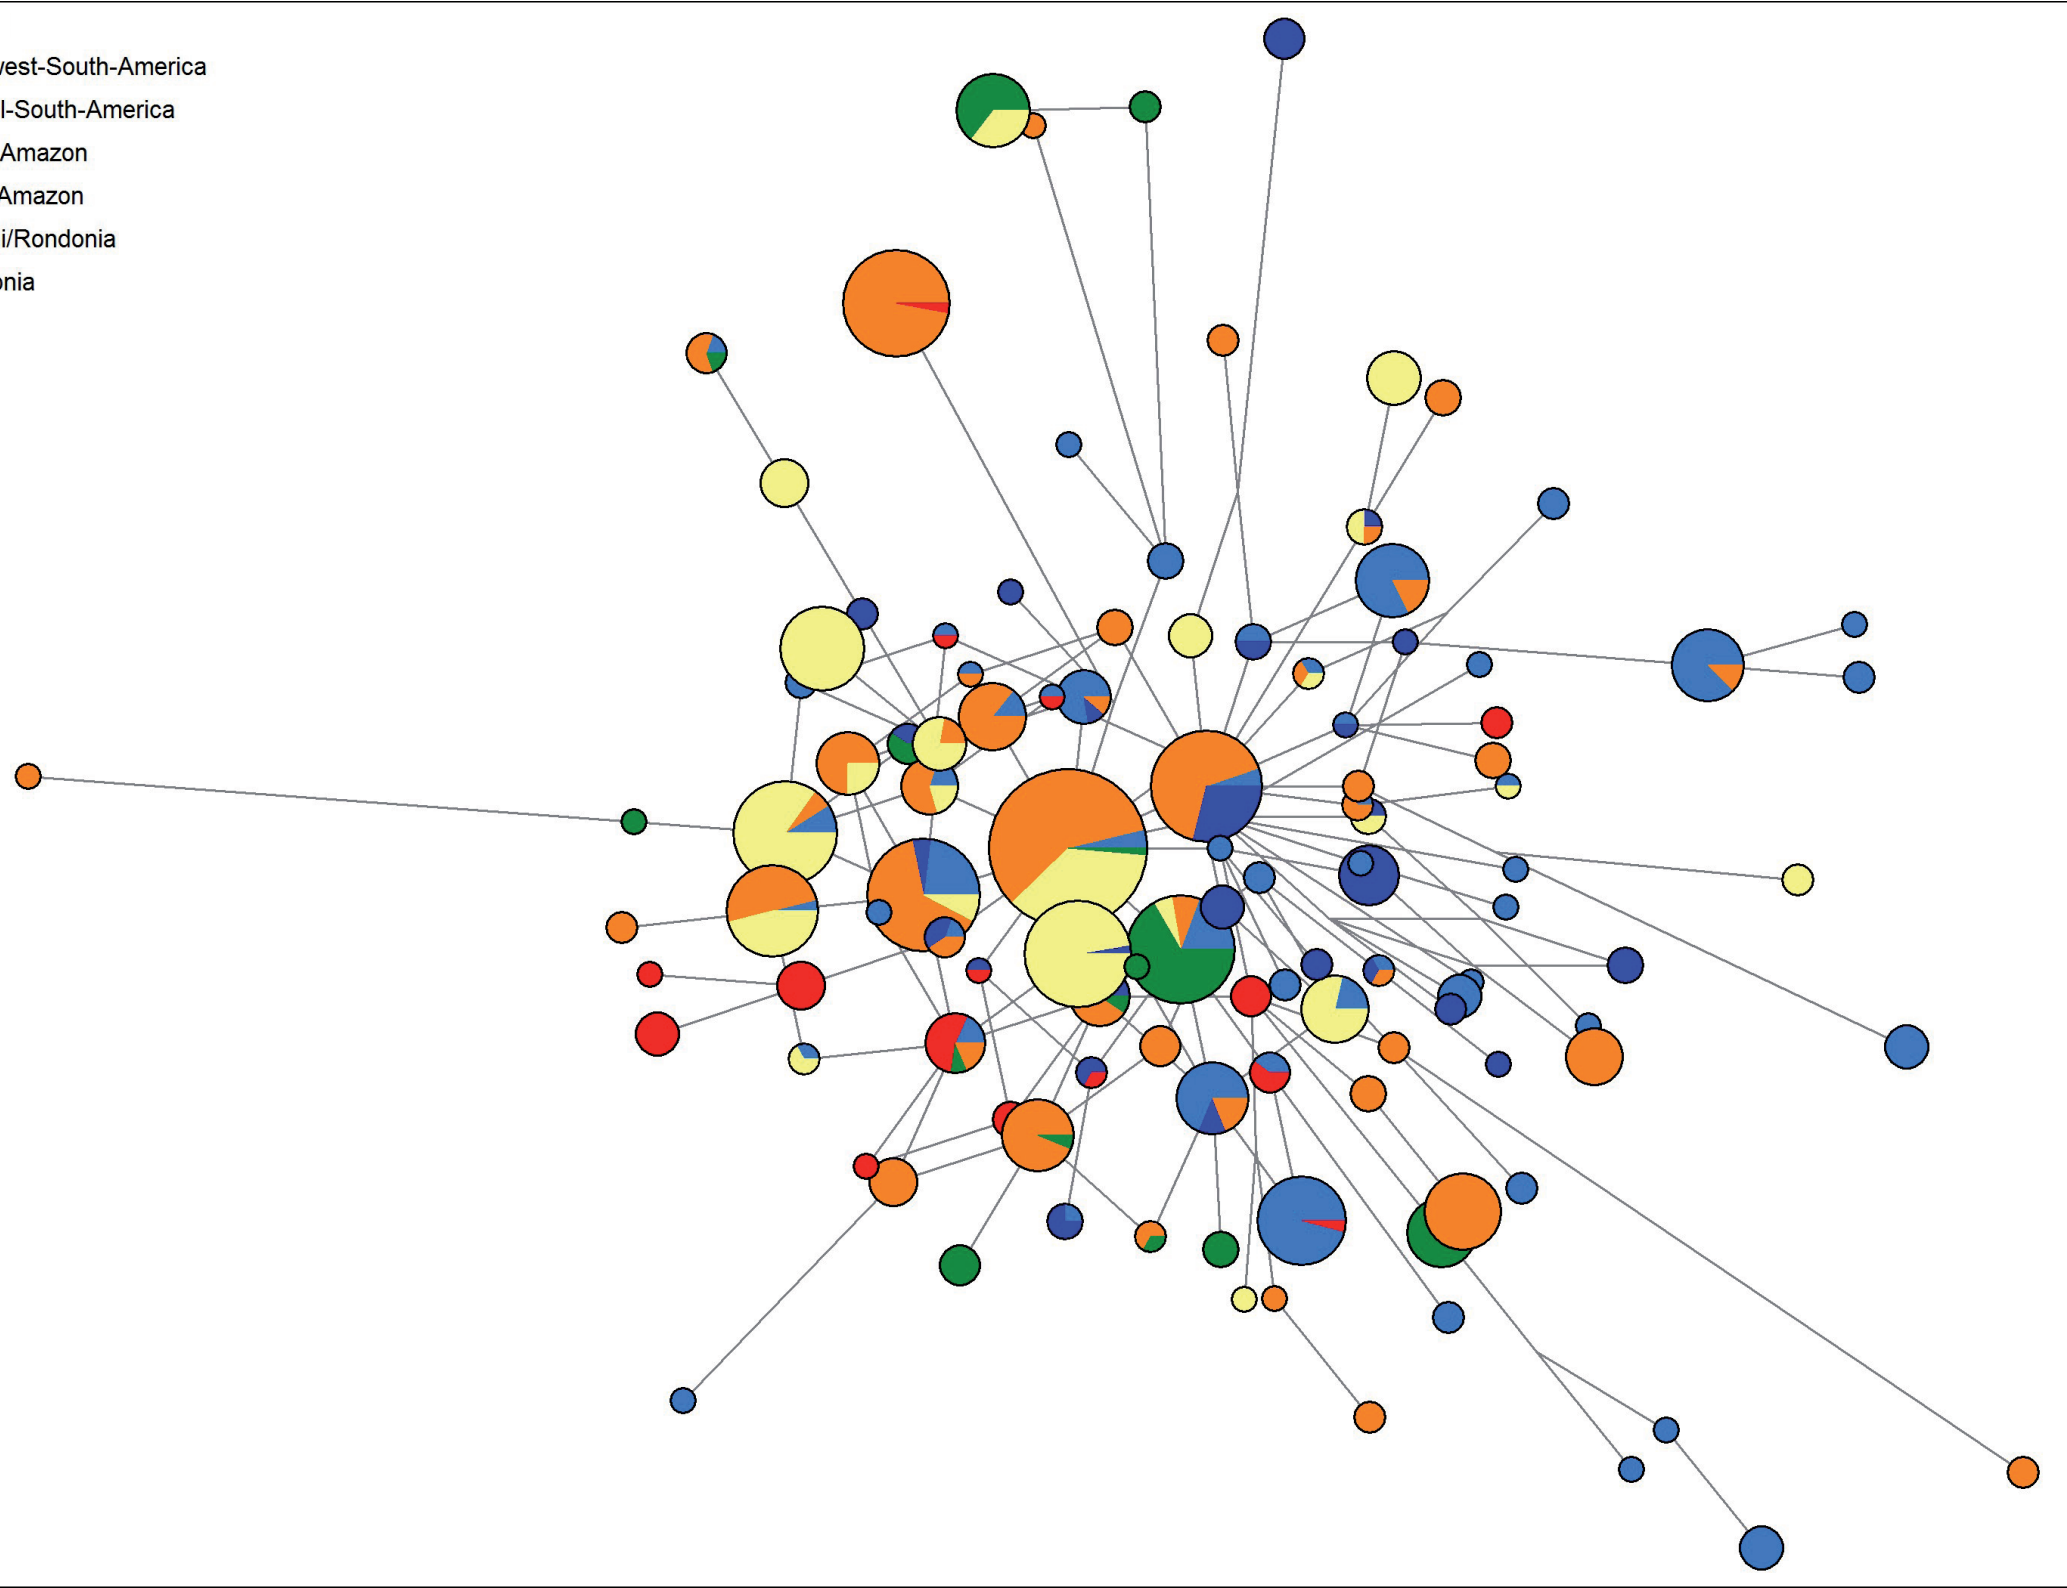

Supplement: pgen.1003460.s004.pdf [file pgen.1003460.s004.pdf]
