# Supplementary material for: Continent-Wide Decoupling of Y-Chromosomal Genetic Variation from Language and Geography in Native South Americans
Source: PubMed Central journal article supplement (PMC3623769; doi:10.1371/journal.pgen.1003460), 2013-04-11

- Equatorial-Tucanoan
- Chibchan-Paezan
- Ge-Pano-Carib
- Andean
- Isolate

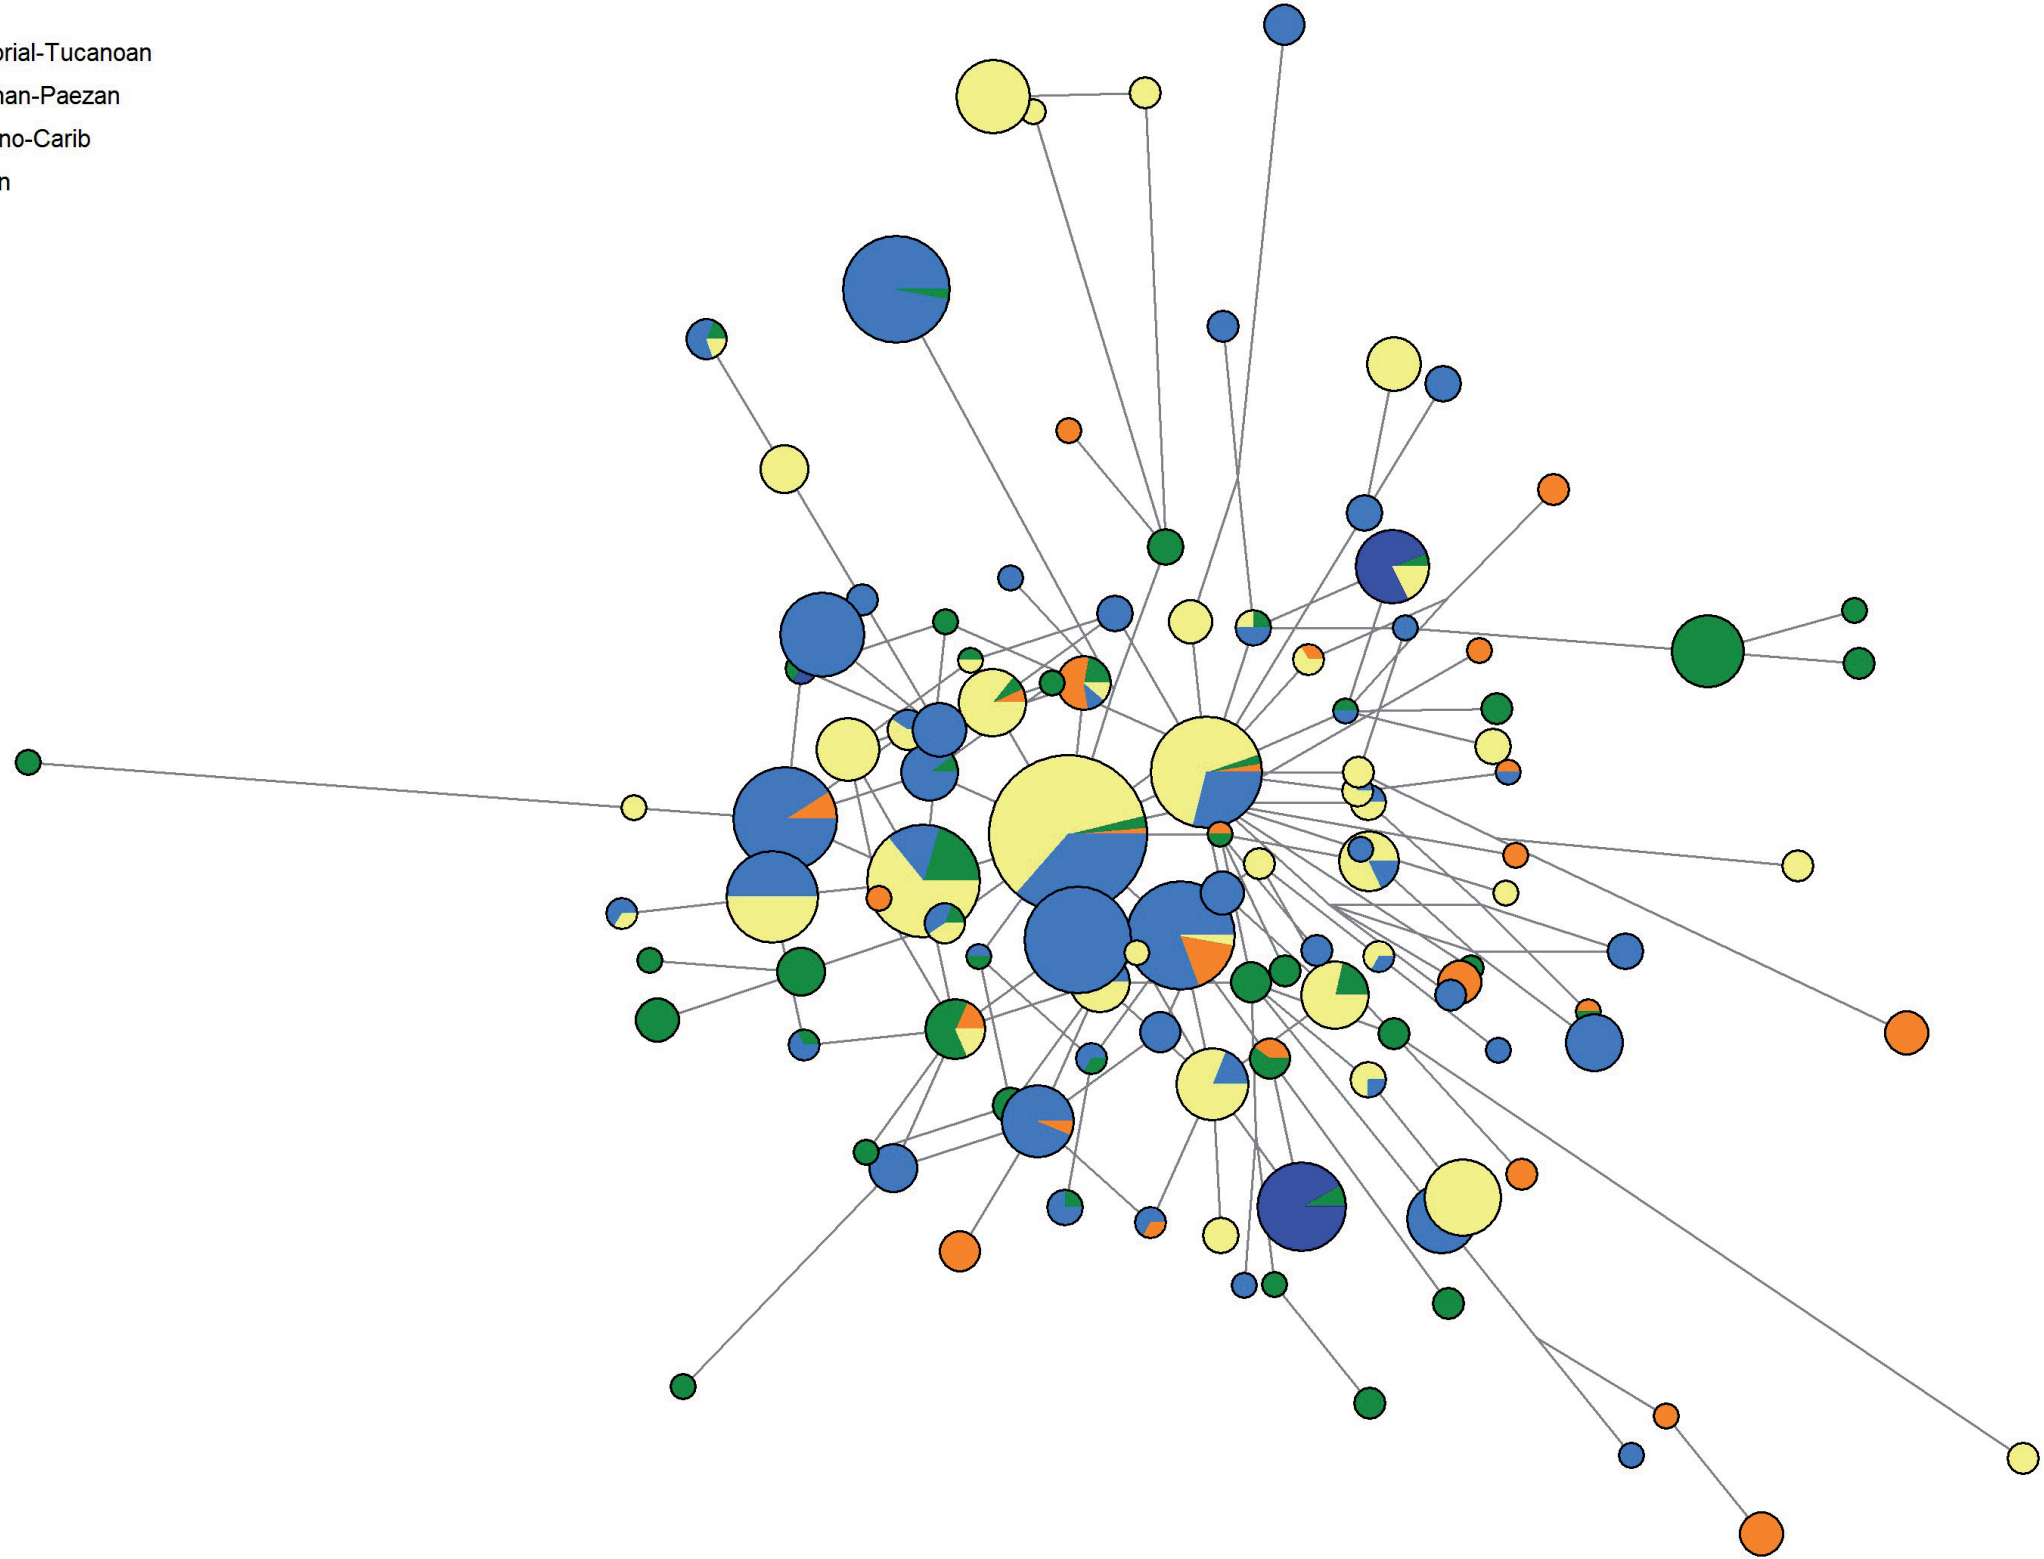

Supplement: pgen.1003460.s007.pdf [file pgen.1003460.s007.pdf]
